# Supplementary material for: Retinoic acid receptor beta and angiopoietin-like protein 1 are involved in the regulation of human androgen biosynthesis
Source: PubMed Central journal article supplement (PMC4429542; doi:10.1038/srep10132), 2015-05-13
Supplement: srep10132-s1.pdf [file srep10132-s1.pdf]

## Supplementary Information

**Manuscript:** Retinoic acid receptor beta and angiopoietin-like protein 1 are involved in the regulation of human androgen biosynthesis

**Authors:** Sameer S. Udhane, Amit V. Pandey, Gaby Hofer, Primus E. Mullis, and Christa E. Flück

### Supplementary Table S1. List of primer sequences used for qRT-PCR

GeneBank accession numbers for source sequences are given in parentheses.

| Primers for qRT-PCR              |                                                                            |
|----------------------------------|----------------------------------------------------------------------------|
| <b>HSD3B2 (NM_000198)</b>        | S: 5'- AAGCTGACTGTACTTGAAGG – 3'<br>AS: 5'- GTGTACAAGGTATCACCATT – 3'      |
| <b>RARB (NM_000965)</b>          | S: 5'- GGTTCCTACTGGCTTGACCAT – 3'<br>AS: 5'- GGCAAAGGTGAACACAAGGT – 3'     |
| <b>ANGPTL1 (NM_004673)</b>       | S: 5'- CACCACCTGATCTGGCAACT – 3'<br>AS: 5'- AATCCCCTGCATTTCCCTGG – 3'      |
| <b>PLK2 (NM_006622)</b>          | S: 5'- CCACCATCACCACCATTTCGC – 3'<br>AS: 5'- CAGACACAATCTGCCTGAGGT – 3'    |
| <b>DUSP6 (NM_001946)</b>         | S: 5'- GTTTTTCCCTGAGGCCATTTC – 3'<br>AS: 5'- TCACAGTGACTGAGCGGCTAAT – 3'   |
| <b>DUSP10 (NM_007207)</b>        | S: 5'- CTGAACATCGGCTACG – 3'<br>AS: 5'- GGTGTAAGGATTCTCGGT – 3'            |
| <b>NPTX2 (NM_002523)</b>         | S: 5'- CATCGAGCTGCTCATCAAC – 3'<br>AS: 5'- CTGCTCTTGCCAAGGATC – 3'         |
| <b>ASS1 (NM_000050)</b>          | S: 5'- GCCCGCAAACAAGTGGAAAT – 3'<br>AS: 5'- TCCAGGATTCCAGCCTCGTA – 3'      |
| <b>ENC1 (NM_001256576)</b>       | S: 5'- GTCCTTCTCCATGCCGGAAA – 3'<br>AS: 5'- GGGCAGCTGGAGGAAATCTT – 3'      |
| <b>CFI (NM_000204)</b>           | S: 5'- GCCATGGCAGAGATGCATTG – 3'<br>AS: 5'- GAAGCCTTTGCCTTGGCATG – 3'      |
| <b>CCDC3 (NM_031455)</b>         | S: 5'- GGGCTACTTCTCGTGCCACTC – 3'<br>AS: 5'- TGCCGGTTGCGCTTCTCC – 3'       |
| <b>FREM2 (NM_207361)</b>         | S: 5'- AGTCGCCACTGTTGAGATCG – 3'<br>AS: 5'- ACATCTCCGCTCCTCCTGAT – 3'      |
| <b>ASCL1 (NM_004316)</b>         | S: 5'- GCGGCCAACAAGAAGATG – 3'<br>AS: 5'- CAAGTCGTTGGAGTAGTTGG – 3'        |
| <b>CYP21A2 (NM_000500)</b>       | S: 5'- AGAGGGATCACATCGTGGAG – 3'<br>AS: 5'- CTTCCAGGAGCTGTCCAGAG – 3'      |
| <b>Cyclophilin A (NM_021130)</b> | S: 5'- GGCAAATGCTGGACCCAACACA – 3'<br>AS: 5'- TGCTGGTCTTGCCATTTCCTGGA – 3' |

**Supplementary Table S2. List of differentially expressed genes in H295R cells under normal growth vs starvation conditions (>1.5 fold)**

By GeneChip Human Gene 1.0 ST array studies. We identified 63 genes when setting the fold change cut-off at 1.5 with an adjusted p-value < 0.05.

| <b>Order</b> | <b>Accession Number</b> | <b>Gene Symbol</b> | <b>Gene Title</b>                                                                   | <b>Fold Change</b> |
|--------------|-------------------------|--------------------|-------------------------------------------------------------------------------------|--------------------|
| 1            | NM_000500               | CYP21A2            | Cytochrome P450, family 21, subfamily A, polypeptide 2                              | 1.83523            |
| 2            | NM_170744               | UNC5B              | Unc-5 homolog B                                                                     | 1.86973            |
| 3            | NM_003009               | SEPW1              | Selenoprotein W, 1                                                                  | 1.96531            |
| 4            | NM_001017425            | KCNK2              | Potassium channel, subfamily K, member 2                                            | -1.7602*           |
| 5            | NM_020338               | ZMIZ1              | Zinc finger, MIZ-type containing 1                                                  | 1.64539            |
| 6            | NM_014848               | SV2B               | Synaptic vesicle glycoprotein 2B                                                    | -1.6558*           |
| 7            | NM_016522               | NTM                | Neurotrimin                                                                         | -1.6963*           |
| 8            | NM_001197294            | DPYSL3             | Dihydropyrimidinase-like 3                                                          | 1.7987             |
| 9            | NM_000624               | SERPINA5           | Serpin peptidase inhibitor, clade A (alpha-1 antiproteinase, antitrypsin), member 5 | 1.5313             |
| 10           | NM_001553               | IGFBP7             | Insulin-like growth factor binding protein 7                                        | 1.77783            |
| 11           | NM_005314               | GRPR               | Gastrin-releasing peptide receptor                                                  | -1.8474*           |
| 12           | NM_002514               | NOV                | Nephroblastoma overexpressed gene                                                   | 1.8505             |
| 13           | NM_001490               | GCNT1              | Glucosaminyl (N-acetyl) transferase 1, core 2                                       | 1.92664            |
| 14           | NM_001128176            | THRB               | Thyroid hormone receptor, beta                                                      | 1.67774            |
| 15           | NM_018407               | LAPTM4B            | Lysosomal protein transmembrane 4 beta                                              | 1.86459            |
| 16           | NM_006084               | IRF9               | Interferon regulatory factor 9                                                      | 1.76116            |
| 17           | NM_016546               | C1RL               | Complement component 1, r subcomponent-like                                         | 1.53157            |
| 18           | NM_001874               | CPM                | Carboxypeptidase M                                                                  | -1.7492*           |
| 19           | NM_002934               | RNASE2             | Ribonuclease, RNase A family, 2 (liver, eosinophil-derived neurotoxin)              | 1.7072             |
| 20           | NM_021202               | TP53INP2           | Tumor protein p53 inducible nuclear protein 2                                       | 1.6294             |
| 21           | NM_030762               | BHLHE41            | Basic helix-loop-helix family, member e41                                           | 1.6084             |
| 22           | NM_004454               | ETV5               | Ets variant 5                                                                       | 1.82798            |
| 23           | NM_201555               | FHL2               | Four and a half LIM domains 2                                                       | 1.53679            |
| 24           | NM_003810               | TNFSF10            | Tumor necrosis factor (ligand) superfamily, member 10                               | 1.61757            |
| 25           | NM_173582               | PGM2L1             | Phosphoglucomutase 2-like 1                                                         | 1.69809            |
| 26           | NM_004460               | FAP                | Fibroblast activation protein, alpha                                                | 1.88712            |
| 27           | NR_024101               | FLJ35776           | Hypothetical LOC649446                                                              | 1.64384            |
| 28           | NM_007053               | CD160              | CD160 molecule                                                                      | 1.67532            |
| 29           | NM_007361               | NID2               | Nidogen 2 (osteonidogen)                                                            | -1.5459*           |
| 30           | NM_201524               | GPR56              | G protein-coupled receptor 56                                                       | 1.71853            |
| 31           | NM_021643               | TRIB2              | Tribbles homolog 2 (Drosophila)                                                     | 1.5145             |
| 32           | NM_003048               | SLC9A2             | Solute carrier family 9 (sodium/hydrogen exchanger), member 2                       | -1.5989*           |
| 33           | NM_005923               | MAP3K5             | Mitogen-activated protein kinase kinase kinase 5                                    | 1.71674            |
| 34           | NM_020809               | ARHGAP20           | Rho GTPase activating protein 20                                                    | 1.5001             |

|           |              |            |                                                                               |          |
|-----------|--------------|------------|-------------------------------------------------------------------------------|----------|
| <b>35</b> | NM_001771    | CD22       | CD22 molecule                                                                 | 1.70581  |
| <b>36</b> | NM_004172    | SLC1A3     | Solute carrier family 1 (glial high affinity glutamate transporter), member 3 | -1.5469* |
| <b>37</b> | NM_133445    | GRIN3A     | Glutamate receptor, ionotropic, N-methyl-D-aspartate 3A                       | -1.5509* |
| <b>38</b> | NM_001195032 | C6orf99    | Chromosome 6 open reading frame 99                                            | -1.6939* |
| <b>39</b> | NM_002543    | OLR1       | Oxidized low density lipoprotein (lectin-like) receptor 1                     | 1.52082  |
| <b>40</b> | NM_153366    | SVEP1      | Sushi, von Willebrand factor type A, EGF and pentraxin domain containing 1    | 1.86166  |
| <b>41</b> | NM_152637    | METTL7B    | Methyltransferase like 7B                                                     | 1.67562  |
| <b>42</b> | NM_005810    | KLRG1      | Killer cell lectin-like receptor subfamily G, member 1                        | 1.66086  |
| <b>43</b> | NM_024704    | KIF16B     | Kinesin family member 16B                                                     | 1.64102  |
| <b>44</b> | NM_015236    | LPHN3      | Latrophilin 3                                                                 | 1.58606  |
| <b>45</b> | NM_002298    | LCP1       | Lymphocyte cytosolic protein 1 (L-plastin)                                    | -1.5299* |
| <b>46</b> | NM_022843    | PCDH20     | Protocadherin 20                                                              | 1.50787  |
| <b>47</b> | NM_001013625 | C1orf192   | Chromosome 1 open reading frame 192                                           | -1.5502* |
| <b>48</b> | NM_199511    | CCDC80     | Coiled-coil domain containing 80                                              | 1.57305  |
| <b>49</b> | NM_012281    | KCND2      | Potassium voltage-gated channel, Shal-related subfamily, member 2             | -1.5775* |
| <b>50</b> | NM_015441    | OLFML2B    | Olfactomedin-like 2B                                                          | 1.639    |
| <b>51</b> | NM_014705    | DOCK4      | Dedicator of cytokinesis 4                                                    | 1.56717  |
| <b>52</b> | NM_018672    | ABCA5      | ATP-binding cassette, sub-family A (ABC1), member 5                           | 1.64576  |
| <b>53</b> | NM_170672    | RASGRP3    | RAS guanyl releasing protein 3 (calcium and DAG-regulated)                    | 1.5215   |
| <b>54</b> | NM_001128596 | TC2N       | Tandem C2 domains, nuclear                                                    | 1.50841  |
| <b>55</b> | NM_212482    | FN1        | Fibronectin 1                                                                 | 1.59342  |
| <b>56</b> | NM_001161429 | RANBP3L    | RAN binding protein 3-like                                                    | 1.60935  |
| <b>57</b> | NM_002164    | IDO1       | Indoleamine 2,3-dioxygenase 1                                                 | 1.61038  |
| <b>58</b> | NR_003530    | MEG3       | Maternally expressed 3 (non-protein coding)                                   | 1.64795  |
| <b>59</b> | NM_001099694 | ZNF578     | Zinc finger protein 578                                                       | -1.7452* |
| <b>60</b> | NM_001012980 | SATL1      | Spermidine/spermine N1-acetyl transferase-like 1                              | -1.5217* |
| <b>61</b> | NM_001102562 | MARCH11    | Membrane-associated ring finger (C3HC4) 11                                    | -1.5395* |
| <b>62</b> | NR_003231    | SNORD113-3 | Small nucleolar RNA, C/D box 113-3                                            | 1.56858  |
| <b>63</b> | NR_003194    | SNORD114-2 | Small nucleolar RNA, C/D box 114-2                                            | 1.55025  |

\*- Sign indicates up-regulation

**Supplementary Table S3. Suggested biological function of the 63 genes found differentially expressed at fold change > 1.5**

Differentially expressed genes in normal growth vs starvation conditions were loaded into DAVID v6.5 software to perform biological functional analysis. Analysis was performed on the 63 gene transcripts identified by microarray analysis setting the fold change cut-off at 1.5 with an adjusted p-value < 0.05.

| <b>Biological Function</b>          | <b>Overexpressed</b>                              | <b>Under expressed</b>                                                                                                       |
|-------------------------------------|---------------------------------------------------|------------------------------------------------------------------------------------------------------------------------------|
| <b>Steroid biosynthetic process</b> |                                                   | CYP21A2                                                                                                                      |
| <b>MAPKKK cascade</b>               |                                                   | RASGRP3, MAP3K5                                                                                                              |
| <b>Signal transduction</b>          | GRPR, GRIN3A, SLC1A3                              | CD22, GPR56, RASGRP3, ARHGAP20, DOCK4, FAP, FN1, LPHN3, NOV, OLFML2B, PCDH20, THRB, TRIB2, TNFSF10, UNC5B                    |
| <b>Cell adhesion</b>                | NTM, NID2                                         | CD22, GPR56, FN1, IGFBP7, NID2, OLR1, PCDH20, SVEP1                                                                          |
| <b>Inflammatory response</b>        |                                                   | C1RL, CFI, FN1, IDO1, KLRG1, OLR1                                                                                            |
| <b>Glycosylation process</b>        | CPM, GRPR, GRIN3A, NID2, NTM, KCNK2, SLC9A2, SV2B | ABCA5, CD160, CD22, GPR56, PCDH20, C1RL, FN1, GCNT1, IGFBP7, KLRG1, LPHN3, NOV, OLFML2B, OLR1, RNASE2, SERPINA5, SVEP1, UNCB |

**Supplementary Figure S1. Heat Map of Affymetrix microarray data showing differentially expressed genes in H295R cells grown under normal and starvation conditions.**

H295R cells were grown under serum-free, starvation (SM) or normal (GM) conditions. RNA was extracted and analyzed for differential gene expression by Affymetrix GeneChip Human Gene 1.0 ST arrays. Data were then analyzed by Cluster 3.0 and Jtreeview software for creating a representative heat map of the 14 genes which were identified at a significance level of fold change > 2. In the heat map graphic rows represent the individual genes. The gene expression levels are displayed for each independent sample. Both genes and samples were clustered by a complete linkage method. Over-expression is indicated in red, under-expression in green.

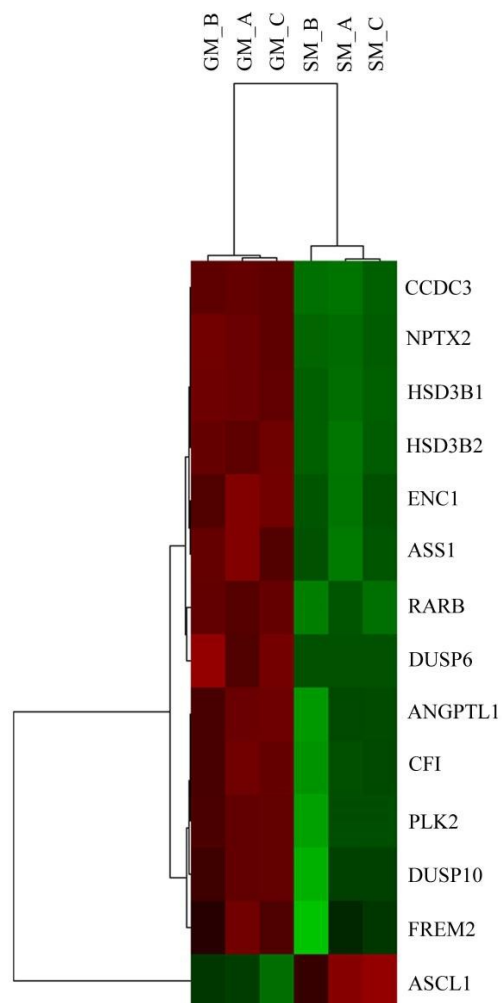

Supplementary Figure S1

**Supplementary Figure S2. Effect of ATRA dose response on H295R steroid profile.**

H295R cells were cultivated in serum free medium for 24 h. Thereafter, cells were grown in presence or absence of ATRA in serum-free medium for another 24 h. Steroid production was labeled with [<sup>3</sup>H] pregnenolone for 90 min. Steroids were extracted and resolved by TLC. A representative TLC is shown on the left and quantitative analysis of steroids on the right side. We found ATRA treatment significantly altered the steroid production when compared to the control. Data are the mean ± SEM of two independent experiments. \* p<0.05, \*\* p<0.01.

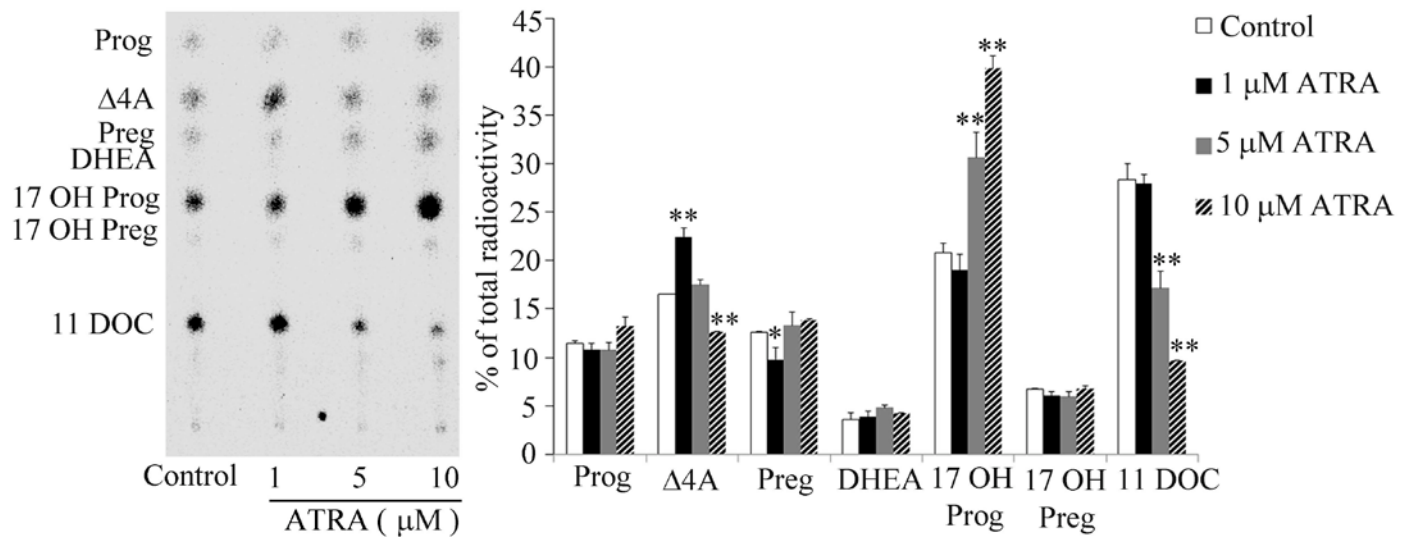

Supplementary Figure S2
